# Supplementary material
Source: publisher figshare collection journal article supplement (https://future-science-group.figshare.com/ndownloader/files/29099955)
Supplement: Supplementary file 1 [file 29099955]

Descriptions:

**Bead shearing: DNA sample is sheared by vortexing in a round-bottom 2 ml tube in the presence of a glass bead.** *A) No special instrumentation needed (+), B) Costs per prep are negligible (+), C) A minimal volume of 5 µl can be used (+), D) Simple procedure can be performed in 1 minute (+).*

**Needle shearing [1]: Relies on shearing forces created by passing DNA through a small gauge needle.** *A) No special instrumentation needed (+), B) Blunt-end needle and syringe cost $1.50-$2.50 (+/-), C) Not optimally suited for volumes below 20 µl, but 10 µl can be processed with some extra effort (+/-), D) Problems with the dead volume make processing challenging, laborious procedure, less suitable for multiple samples (+/-).*

**Centrifugal shearing [2]: Shearing forces are introduced by centrifuging DNA through a hole of defined size in a microfuge type tube.** *A)**Specialized tube can be used in standard microcentrifuge (+), B) with $30 per sample considerable costs (-), C) Requires 150 µl sample volume (-), D) Easy to use with single centrifugation step (+).*

**Sonication [3,4,5,6]: Sonicators subject DNA to unfocused, longer-wavelength acoustic energy; sonicators require a cooling period between sonication bursts. Many different systems are available employing either a probe or -bath design.** *A) Requires specialized equipment (-), B) Consumable costs per sample depend on the system and may be considerable, but some devices allow for the use of standard laboratory plastic ware (+/-), C) Requires sample volume of at least 20 µl (-), D) Sonication takes several minutes and requires optimization for different sample types. Multiwell formats exist. (+/-).*

**Acoustic shearing [7,8]: Short-wavelength, high-frequency acoustic energy is focused on the DNA sample, physically disrupting the DNA molecule (Adaptive Focused Acoustics technology); requires temperature control.** *A) Requires specialized instrumentation (-), B) Requires use of special tubes that cost >$5 per sample (-), C) Volumes >100 µl are used (-), D) Setting of instrumentation and loading and unloading vials costs time but procedure can be standardized and used in multiwell formats (+/-).*

**Nebulization [9,10]: Shearing by nebulization via a high-pressure air flow that pushes the sample liquid through a narrow orifice.** *A) Requires the presence of compressed air, argon or nitrogen tanks, which are not standard in all lab settings (+/-), B) Although not commonly in use anymore, disposable units represent considerable costs per sample (-), C) Working volume is 750 µl, requires minimal DNA input amount of 3 µg (-), D) Laborious workflow that includes ethanol precipitation (-).*

**Hydrodynamic shearing [11,12,13,14,15,16,17]: A syringe pump generates hydrodynamic shear forces within a tube or a pore (point-sink principle); the size of the constriction and the flow rate of the liquid determine the DNA fragment size.** *A) Requires instrumentation. Many different instruments and solutions are available (-), B) No consumables needed for sample processing (+), C) Requires volumes of >100 µl, chip-based formats exist (-), D) Depending on system process can be standardized and automated but system tubing needs to be cleaned after each sample (+/-).*

References:

1. Gong, L, Wong, CH, Idol, J, Ngan, CY, Wei, CL. Ultra-long Read Sequencing for Whole Genomic DNA Analysis. *J. Vis. Exp.* (145), e58954 (2019).
2. Guillaume, D, Chris Boles, J. Complementary DNA Shearing and Size-selection Tools for Mate-pair Library Construction. *Biomol. Tech.* 23 (Suppl), 36-37 (2012).
3. Deininger, PL. Random subcloning of sonicated DNA: Application to shotgun DNA sequence analysis. *Anal. Biochem.* 129, 216–223 (1983)
4. Elsner, HI, Lindblad, EB. Ultrasonic degradation of DNA. *DNA* 8, 697–701 (1989).
5. Santos, HM, Lodeiro, C, Capelo-Martínez, J-L. The Power of Ultrasound. In: Capelo-Martínez, J-L, (Ed.) *Ultrasound in Chemistry*. Wiley-VCH Verlag GmbH & Co., Weinheim, Germany. 1–16 (2009).
6. Kasoji, SK, Pattenden, SG, Malc, EP *et al*. Cavitation Enhancing Nanodroplets Mediate Efficient DNA Fragmentation in a Bench Top Ultrasonic Water Bath. *PLoS One* 10, e0133014 (2015).
7. Poptsova, M, Il'icheva, I, Nechipurenko, D. *et al.* Non-random DNA fragmentation in next-generation sequencing. *Sci. Rep.* 4**,** 4532 (2014).
8. Park, G, Park, JK, Shin, SH *et al.* Characterization of background noise in capture-based targeted sequencing data. *Genome Biol.* 18**,** 136 (2017).
9. Lentz, YK, Worden, LR, Anchordoquy, TJ, Lengsfeld, CS. Effect of jet nebulization on DNA: identifying the dominant degradation mechanism and mitigation methods. *J. Aerosol. Sci.* 36, 973–990 (2005).
10. Burger G, Lavrov DV, Forget L, Lang BF. Sequencing complete mitochondrial and plastid genomes. *Nat. Protocols*2, 603–614 (2007).
11. Yew, FF, Davidson, N. Breakage by hydrodynamic shear of the bonds between cohered ends of lambda-DNA molecules. *Biopolymers* 6, 659–679 (1968).
12. Oefner, PJ, Hunicke-Smith, SP, Chiang, L *et al*. Efficient random subcloning of DNA sheared in a recirculating point-sink flow system. *Nucleic Acids. Res*. 24, 3879–3886 (1996).
13. Thorstenson, YR, Hunicke-Smith, SP, Oefner, PJ, Davis, RW. An automated hydrodynamic process for controlled, unbiased DNA shearing. *Genome Res.* 8, 848–855 (1998).
14. Joneja, A, Huang, X. H. A device for automated hydrodynamic shearing of genomic DNA. *Biotechniques* 46, 553–556 (2009).
15. Shui, L, Bomer, JG, Jin, M, Carlen, ET, van den Berg, A. Microfluidic DNA fragmentation for on-chip genomic analysis. *Nanotechnology* 22, 494013 (2011).
16. Shui, LL, Sparreboom, W, Spang, P *et al*. High yield DNA fragmentation using cyclical hydrodynamic shearing. *Rsc. Adv*. 3, 13115–13118 (2013).
17. Li, L, Jin, M, Sun, C *et al*. High Efficiency Hydrodynamic DNA Fragmentation in a Bubbling System. *Sci. Rep.* 7, 40745 (2017).
